# Supplementary material for: Capsaicin Interaction with TRPV1 Channels in a Lipid Bilayer: Molecular Dynamics Simulation
Source: PubMed Central journal article supplement (PMC4375533; doi:10.1016/j.bpj.2015.02.013), 2015-03-24
Supplement: mmc1.pdf [file mmc1.pdf]

Supporting Material for:

## Capsaicin Interaction with TRPV1 Channels in a Lipid Bilayer: Molecular Dynamics Simulation

Sonya M. Hanson, Simon Newstead, Kenton J. Swartz, & Mark S.P. Sansom

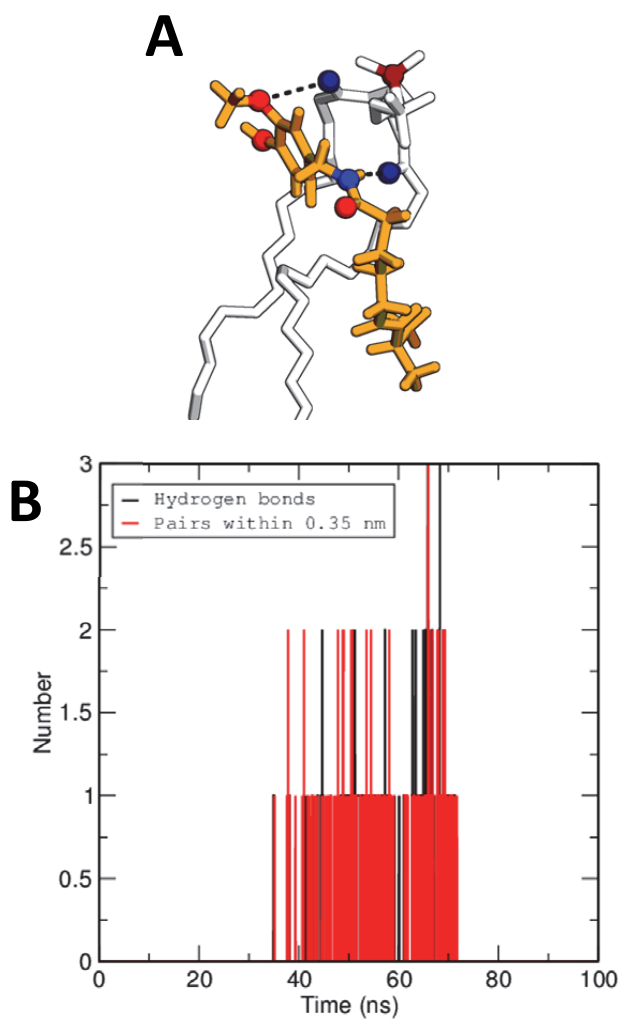

FIGURE S1 **POPC and Capsaicin hydrogen bonding interaction.** (A) An example of a long-lived hydrogen bonding interaction between a carbonyl group of a POPC molecule (in white) and the B region of capsaicin (in orange). (B) Number of H-bonds vs. time between capsaicin and the selected POPC molecule. This interaction is maintained for more than 30 ns of the simulation.

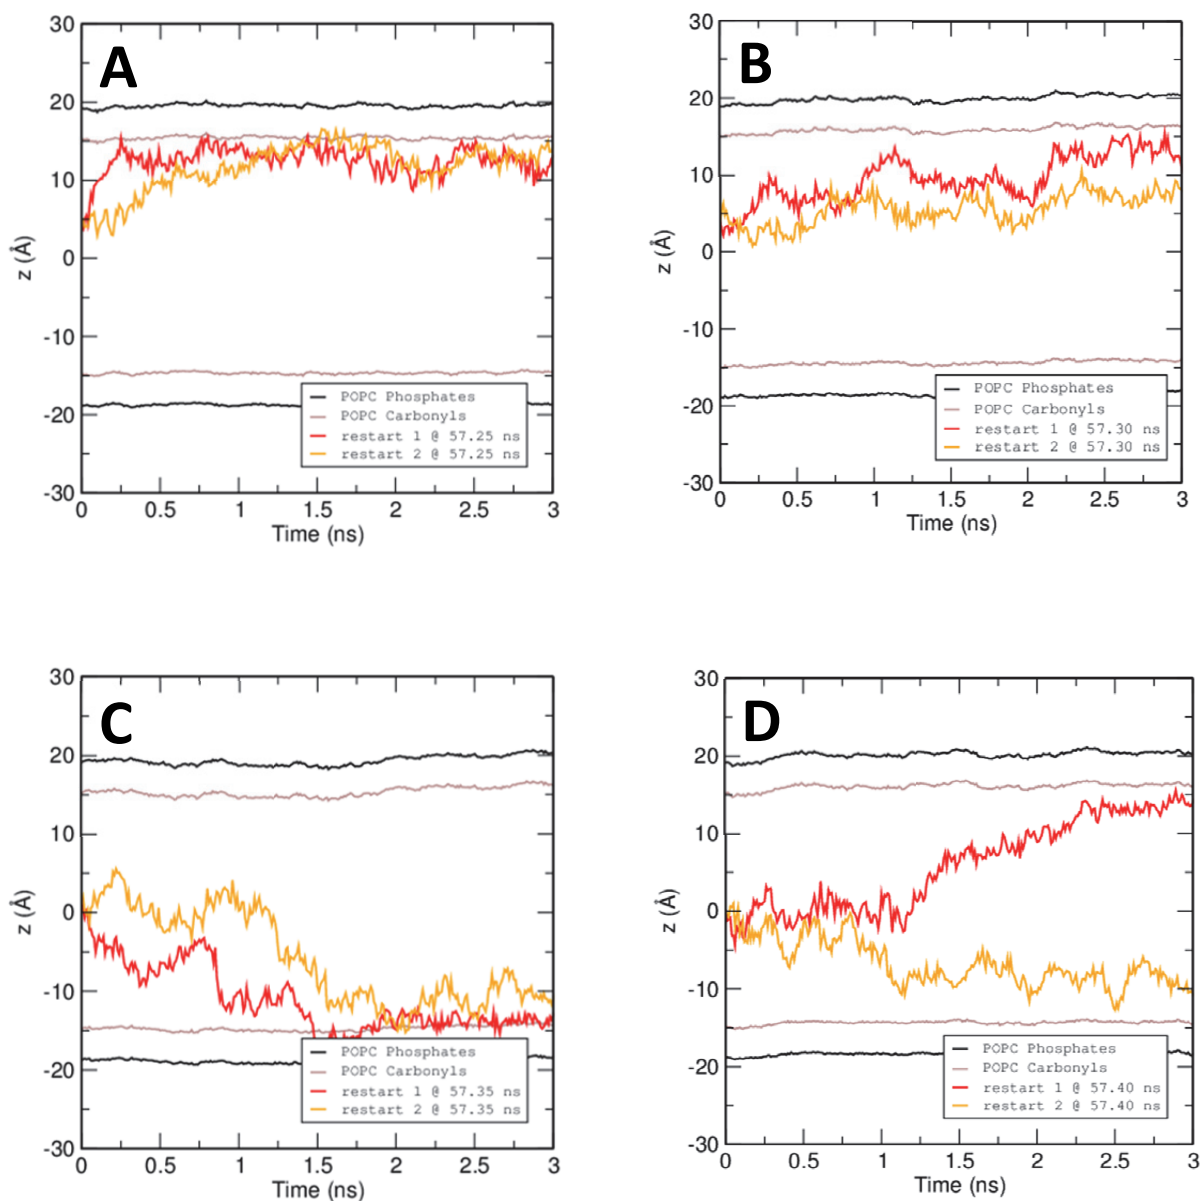

FIGURE S2 **Multiple simulations initiated at selected points along the original capsaicin flip-flop trajectory.** (A) Shows two repeats (red and orange lines) with different random velocity seeds using a starting position at 57.25 ns, (B) at 57.30 ns, (C) at 57.35 ns, and (D) at 57.40 ns along the original trajectory which yielded a flip-flop event. Red or orange lines represent the center of mass of capsaicin during different repeats. Black lines represent the phosphate head groups of POPC. Brown lines represent the carbonyls of POPC.

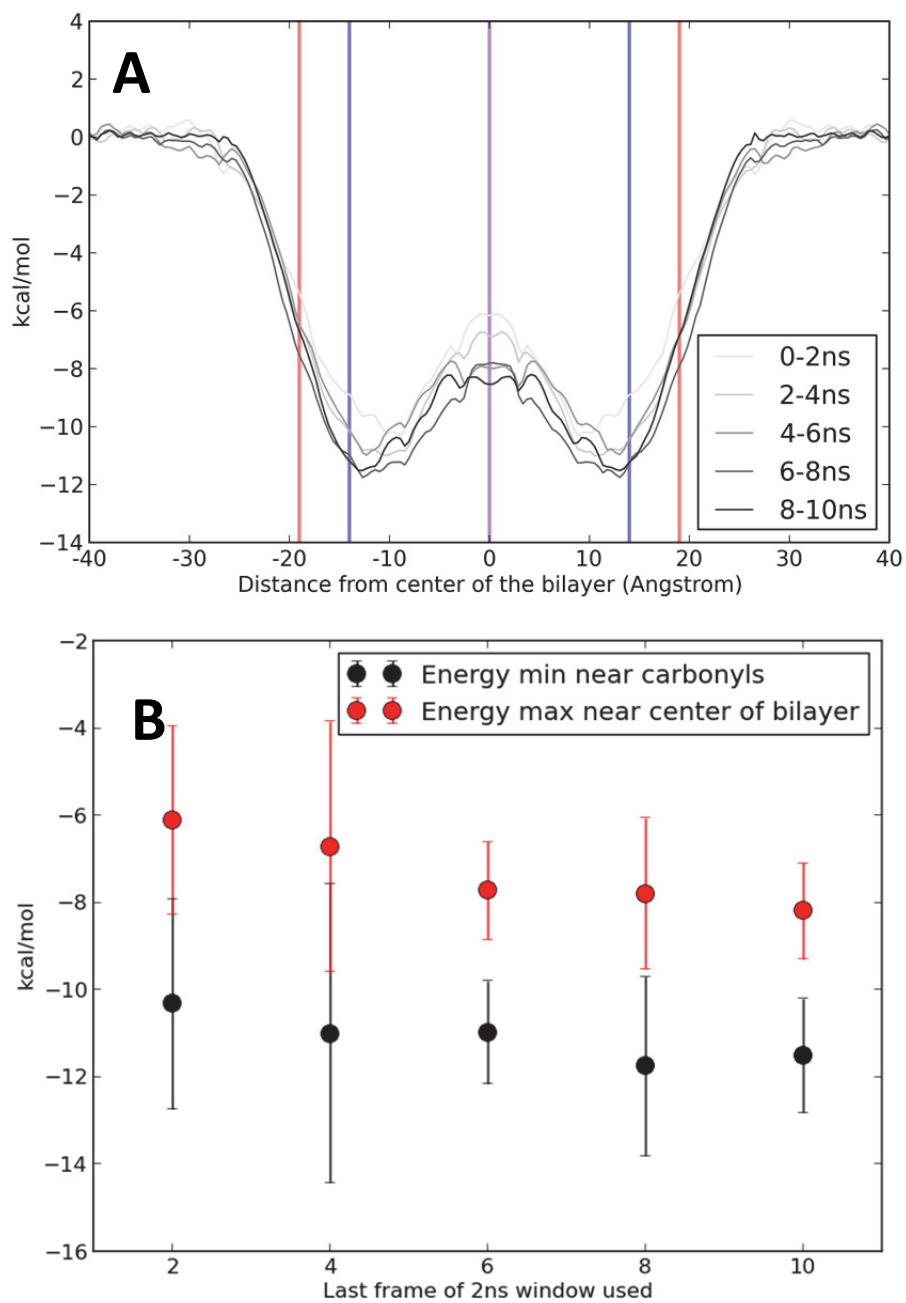

FIGURE S3 **PMF Convergence.** (A) PMF profiles as calculated from consecutive 2 ns segments of the full 10 ns simulations of 1 Å windows across the bilayer. (B) The values of the energy minima near the carbonyls ( $z = \pm 12$  Å) and the energy maxima near the center of the bilayer ( $z = 0$  Å) were calculated for the consecutive PMFs in A to provide a measure of convergence of the free energy profile.

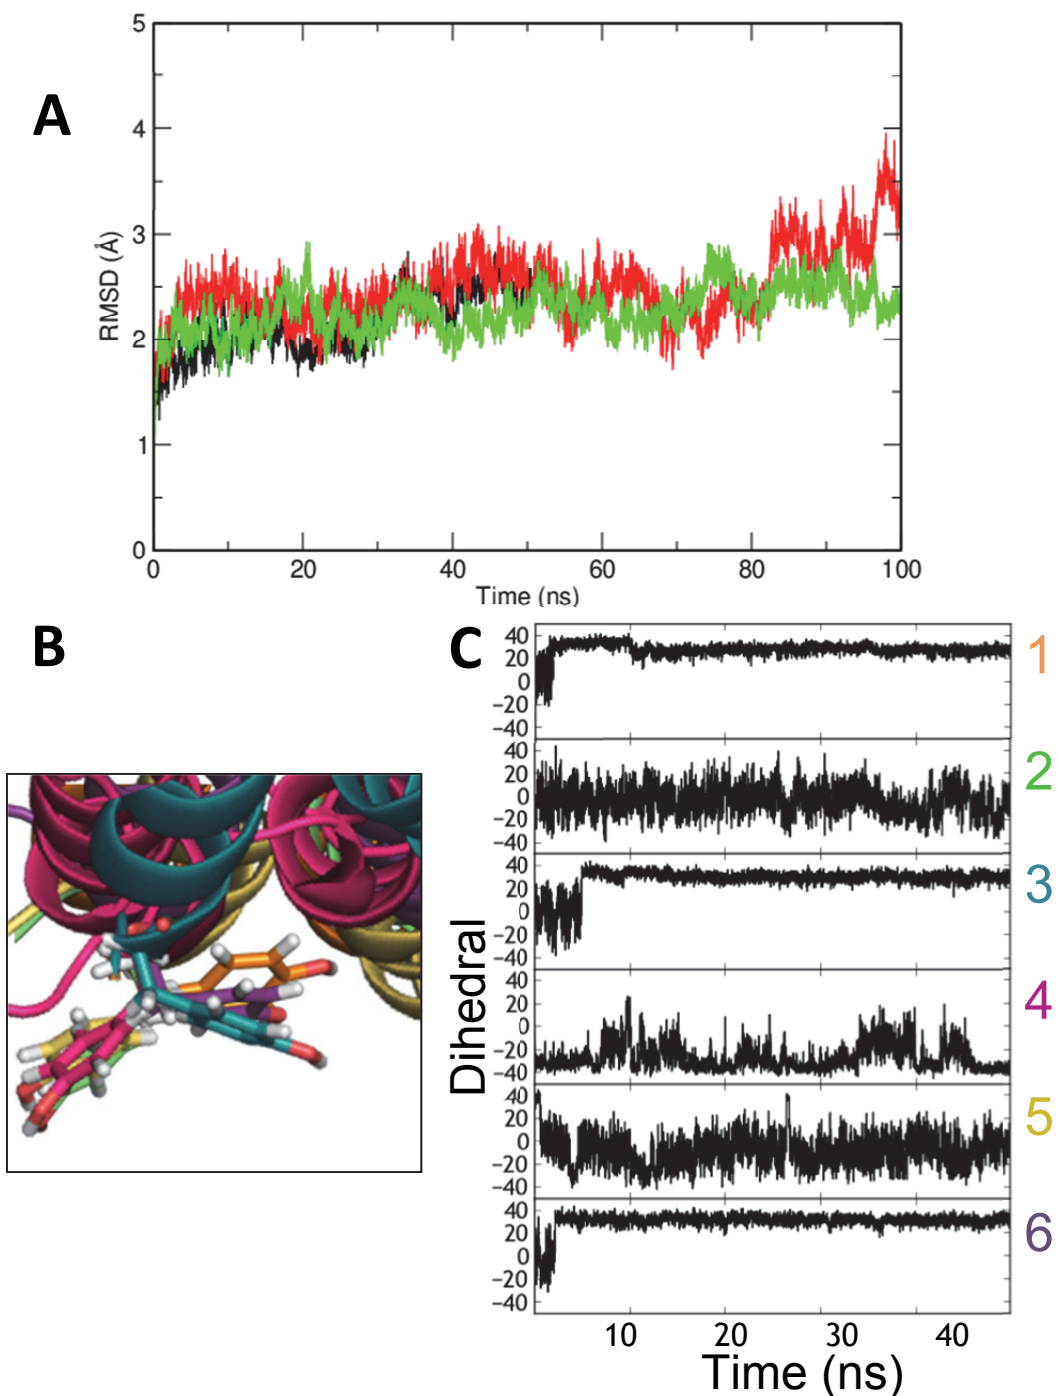

**FIGURE S4 Analysis of stability of the TRPV1 S1-S4 in model membrane.** (A) The backbone RMSD from the initial structure of the S1-S4 domain of TRPV1 over the course of three repeat 100 ns simulations. (B) The flip from an outward to an inward conformation of the sidechain of tyrosine 511. (C) Changes in the  $X_1$  dihedral angle of Tyr511 over time of six separate simulations (colored accordingly) of the S1-S4 of the apo EM structure in a POPC bilayer.

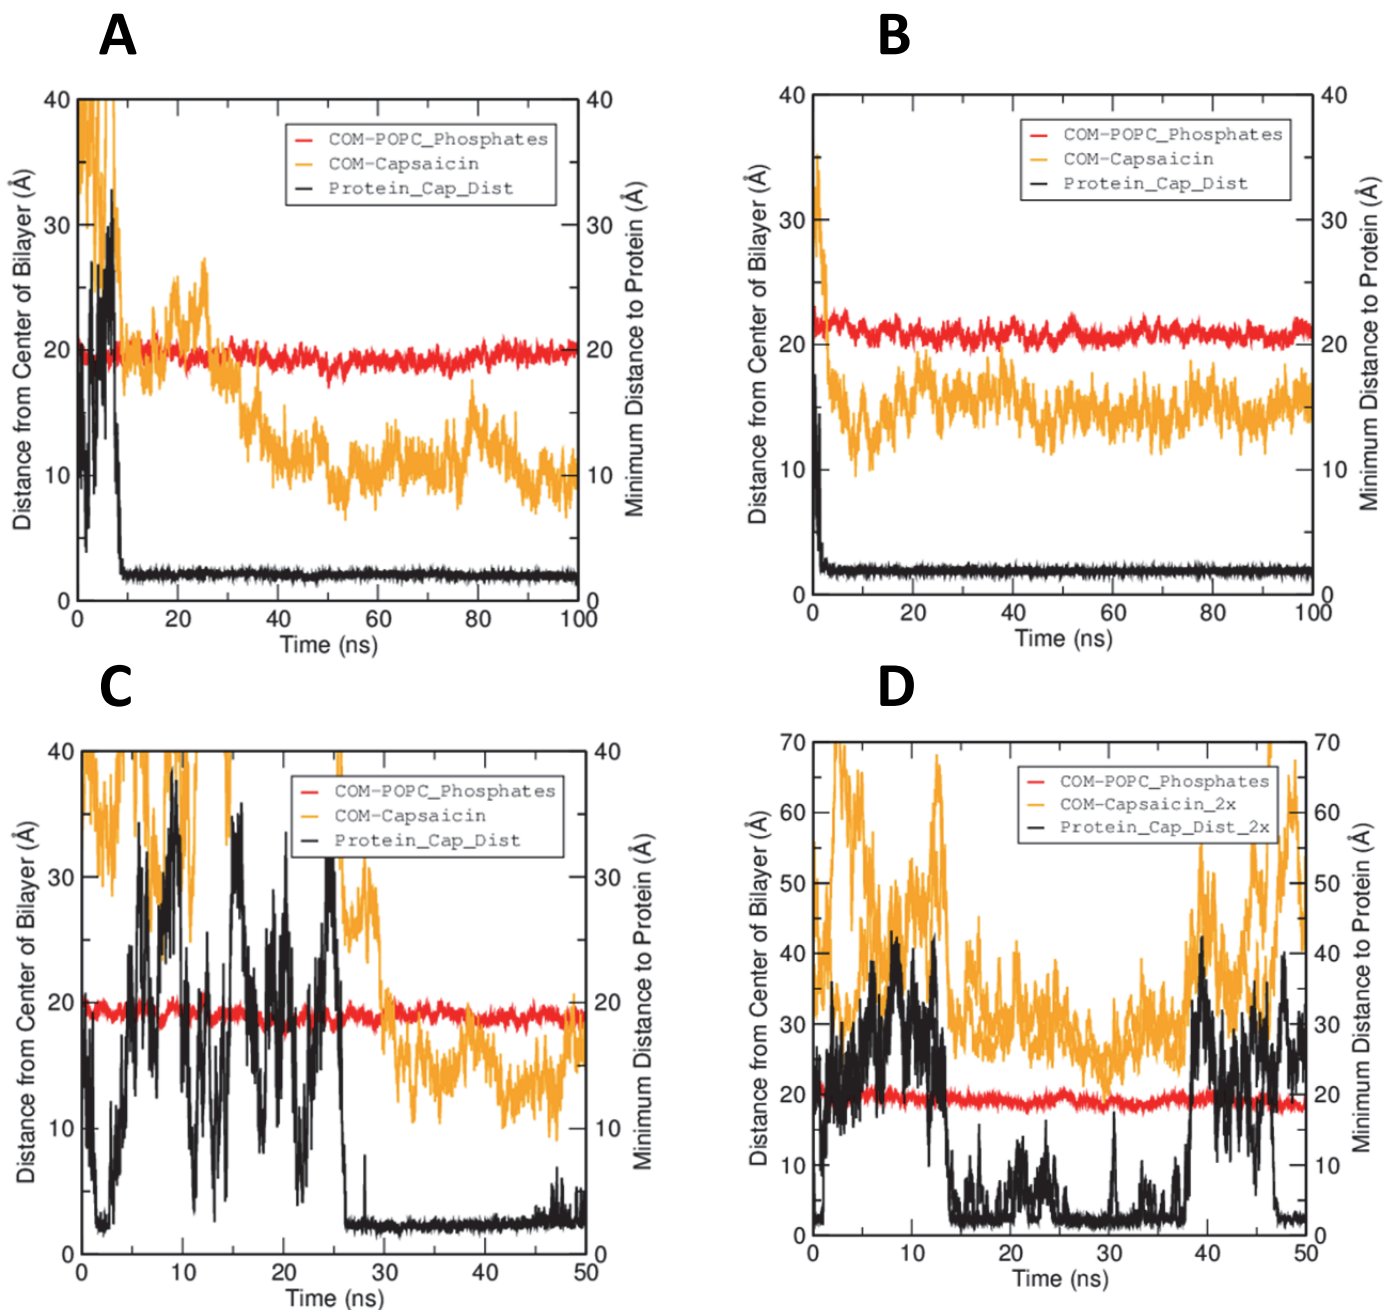

**FIGURE S5 Capsaicin interaction with TRPV1 S1-S4 compared to its membrane penetration.** Plots of the minimum distance of interacting capsaicin molecules to the TRPV1 S1-S4 domain over the course of four simulations (black), overlaid with the bilayer penetration as shown by the center of mass of capsaicin (orange) relative to that of the phosphates of the intracellular leaflet (red). This is shown for two capsaicin molecules that interact with the S1 helix (A) and (B), and for three capsaicin molecules that interact with the S2-S3 loop (C) and (D). (D) is an interaction between a two-capsaicin aggregate and the TRPV1 S1-S4. Notice how in A-C the capsaicin interacts with the protein before and during bilayer penetration.

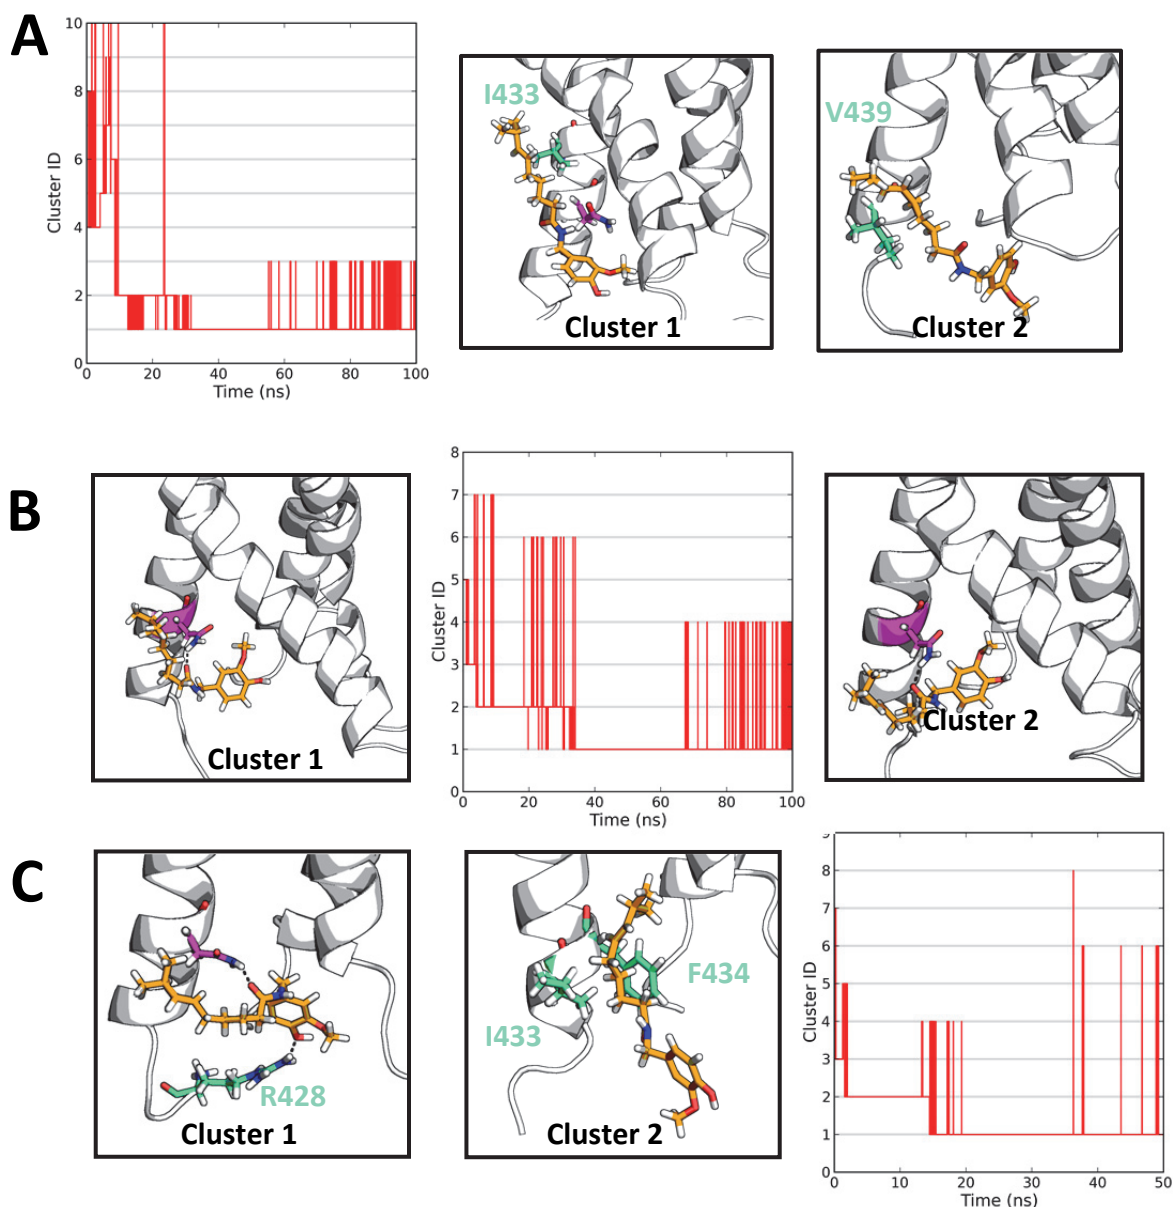

**FIGURE S6 Results of cluster analysis for 'encounter complex' simulations in which interactions are seen between capsaicin and the S1 helix. (A)** Cluster analysis of one 100 ns simulation results in a final cluster that involves N437 (magenta), but also I433 (teal). In the second-most dominant cluster the interaction with N437 is not seen, and V439 (teal) instead is seen to interact with capsaicin, perhaps on it's way to a more stable pose. **(B)** This 100 ns simulation is also the one shown in Fig. 7. Cluster analysis shows a dominant cluster in which capsaicin interacts with N437 (magenta). The second-most dominant cluster also shares this interaction, but the C group acyl chain tail is in a different orientation. **(C)** In this 50 ns simulation, an interaction between capsaicin and the S1 helix is also seen, and the N437 (magenta) interaction is once again observed in the most dominant cluster. However, the R428 (teal) interaction is also seen. This interaction may be an artifact of the S1-S4 helices being truncated from the rest of the full length protein, although it is not seen in the other two simulations.



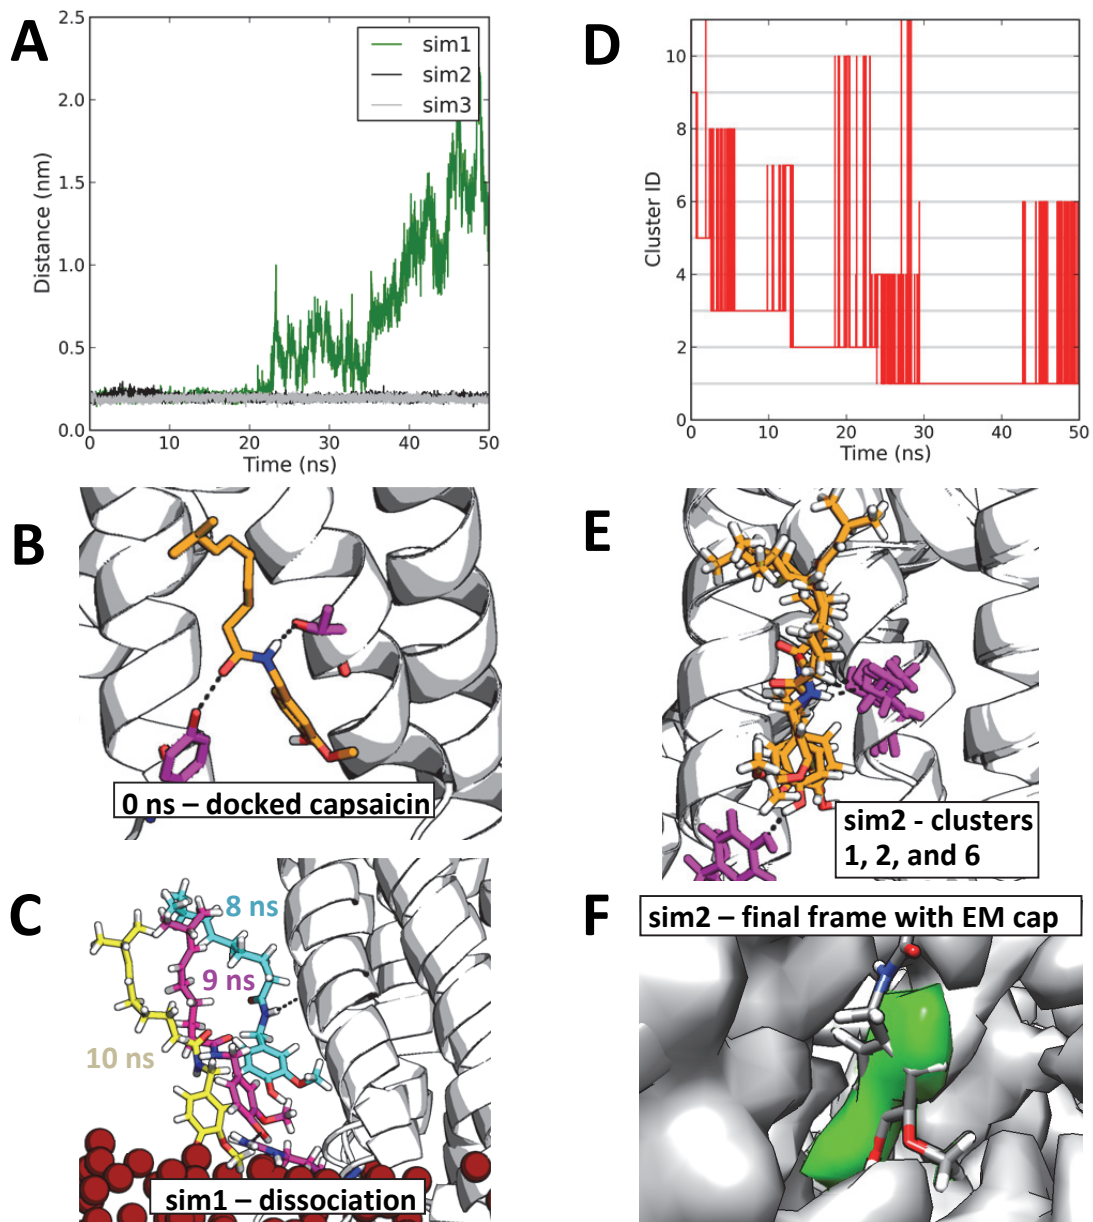

**FIGURE S7 Results of 50ns simulation of capsaicin docked to TRPV1.** (A) In two out of three simulations capsaicin continued to equilibrate within the docked position between the S3 and S4. (B) The docked pose of capsaicin was the top-ranked pose found using the Autodock Vina program and the full-length TRPV1 (PDB ID: 3J5R). T550 and Y511 are shown in magenta. (C) In the simulation in which capsaicin dissociated from the S1-S4 helices it initially had formed a hydrogen bond with T550 (cyan) and then began to dissociate, interacting with an arginine at the intracellular side of the S4 (magenta) and then finally with only the POPC molecules (yellow) in a position seen in the capsaicin-bilayer only simulations. (D) Cluster analysis of one of the simulations in which capsaicin remained in the docked pose shows small shifts toward a final cluster. (E) Three of the dominant clusters from D (1, 2, and 6) are shown. A change from the initial docked pose is that now Y511 forms a hydrogen bonding interaction with the A group aromatic region instead of the B group. (F) An overlay of the final frame of this simulation shows that the A group of capsaicin overlaps with density suspected to correspond to capsaicin in the sharpened EM density (deep green) of the capsaicin bound structure (temperature factor -200 Å, filtered to 4.2 Å, shown at sigma level 8).

## Supporting Material - Parameter (\*.itp) file for capsaicin

```

[ moleculetype ]
; name nrexcl
CAP 3

[ atoms ]
; nr type resnr residu atom cgnr charge mass ;
  1 opls_145 1 CAP C1 1 -0.11500 12.01100 ; -0.1150000
  2 opls_146 1 CAP H12 1 0.11500 1.00800 ; 0.0000000
  3 opls_145 1 CAP C2 2 -0.11500 12.01100 ; -0.1150000
  4 opls_145 1 CAP C3 3 -0.11500 12.01100 ; -0.2300000
  5 opls_146 1 CAP H13 3 0.11500 1.00800 ; -0.1150000
  6 opls_145 1 CAP C4 4 -0.11500 12.01100 ; -0.2300000
  7 opls_146 1 CAP H14 4 0.11500 1.00800 ; -0.1150000
  8 opls_166 1 CAP C5 5 0.15000 12.01100 ; 0.0350000
  9 opls_166 1 CAP C6 6 0.15000 12.01100 ; 0.1850000
 10 opls_179 1 CAP O1 6 -0.28500 15.99940 ; -0.1000000
 11 opls_157 1 CAP C7 7 0.13000 12.01100 ; 0.0450000
 12 opls_156 1 CAP H17 7 0.04000 1.00800 ; 0.0850000
 13 opls_156 1 CAP H18 7 0.04000 1.00800 ; 0.1250000
 14 opls_156 1 CAP H19 7 0.04000 1.00800 ; 0.1650000
 15 opls_167 1 CAP O2 5 -0.58500 15.99940 ; -0.4200000
 16 opls_168 1 CAP H20 5 0.43500 1.00800 ; 0.0150000
 17 opls_244 1 CAP C8 8 0.08000 12.01100 ; 0.0950000
 18 opls_140 1 CAP H10 8 0.06000 1.00800 ; 0.1550000
 19 opls_140 1 CAP H11 8 0.06000 1.00800 ; 0.2150000
 20 opls_238 1 CAP N1 8 -0.50000 14.00670 ; -0.2850000
 21 opls_241 1 CAP H21 8 0.30000 1.00800 ; 0.0150000
 22 opls_235 1 CAP C9 9 0.50000 12.01100 ; 0.5150000
 23 opls_136 1 CAP C10 10 -0.12000 12.01100 ; 0.3950000
 24 opls_140 1 CAP H8 10 0.06000 1.00800 ; 0.4550000
 25 opls_140 1 CAP H9 10 0.06000 1.00800 ; 0.5150000
 26 opls_236 1 CAP O3 9 -0.50000 15.99940 ; 0.0150000
 27 opls_136 1 CAP C11 11 -0.12000 12.01100 ; -0.1050000
 28 opls_140 1 CAP H7 11 0.06000 1.00800 ; -0.0450000
 29 opls_140 1 CAP H16 11 0.06000 1.00800 ; 0.0150000
 30 opls_136 1 CAP C12 12 -0.12000 12.01100 ; -0.1050000
 31 opls_140 1 CAP H5 12 0.06000 1.00800 ; -0.0450000
 32 opls_140 1 CAP H6 12 0.06000 1.00800 ; 0.0150000
 33 opls_136 1 CAP C13 13 -0.12000 12.01100 ; -0.1050000
 34 opls_140 1 CAP H4 13 0.06000 1.00800 ; -0.0450000
 35 opls_140 1 CAP H15 13 0.06000 1.00800 ; 0.0150000
 36 opls_142 1 CAP C14 14 -0.11500 12.01100 ; -0.1000000
 37 opls_144 1 CAP H3 14 0.11500 1.00800 ; 0.0150000
 38 opls_142 1 CAP C15 15 -0.11500 12.01100 ; -0.1000000
 39 opls_144 1 CAP H1 15 0.11500 1.00800 ; 0.0150000
 40 opls_137 1 CAP C16 16 -0.06000 12.01100 ; -0.0450000
 41 opls_140 1 CAP H2 16 0.06000 1.00800 ; 0.0150000
 42 opls_135 1 CAP C17 17 -0.18000 12.01100 ; -0.1650000
 43 opls_140 1 CAP H25 17 0.06000 1.00800 ; -0.1050000
 44 opls_140 1 CAP H26 17 0.06000 1.00800 ; -0.0450000
 45 opls_140 1 CAP H27 17 0.06000 1.00800 ; 0.0150000
 46 opls_135 1 CAP C18 18 -0.18000 12.01100 ; -0.1650000
 47 opls_140 1 CAP H22 18 0.06000 1.00800 ; -0.1050000
 48 opls_140 1 CAP H23 18 0.06000 1.00800 ; -0.0450000
 49 opls_140 1 CAP H24 18 0.06000 1.00800 ; 0.0150000
; total molecule charge = 0.0000000

[ bonds ]
; ai aj funct b0 kb ;
  1 3 1 0.14000 392459. ; C1- C2
  1 9 1 0.14000 392459. ; C1- C6
  3 4 1 0.14000 392459. ; C2- C3

```



|    |    |   |         |         |   |      |     |
|----|----|---|---------|---------|---|------|-----|
| 4  | 6  | 1 | 0.14000 | 392459. | ; | C3-  | C4  |
| 6  | 8  | 1 | 0.14000 | 392459. | ; | C4-  | C5  |
| 8  | 9  | 1 | 0.14000 | 392459. | ; | C5-  | C6  |
| 9  | 10 | 1 | 0.13640 | 376560. | ; | C6-  | O1  |
| 10 | 11 | 1 | 0.14100 | 267776. | ; | O1-  | C7  |
| 8  | 15 | 1 | 0.13640 | 376560. | ; | C5-  | O2  |
| 3  | 17 | 1 | 0.15100 | 265266. | ; | C2-  | C8  |
| 17 | 20 | 1 | 0.14490 | 282002. | ; | C8-  | N1  |
| 20 | 22 | 1 | 0.13350 | 410032. | ; | N1-  | C9  |
| 22 | 23 | 1 | 0.15220 | 265266. | ; | C9-  | C10 |
| 22 | 26 | 1 | 0.12290 | 476976. | ; | C9-  | O3  |
| 23 | 27 | 1 | 0.15290 | 224262. | ; | C10- | C11 |
| 27 | 30 | 1 | 0.15290 | 224262. | ; | C11- | C12 |
| 30 | 33 | 1 | 0.15290 | 224262. | ; | C12- | C13 |
| 33 | 36 | 1 | 0.15100 | 265266. | ; | C13- | C14 |
| 36 | 38 | 1 | 0.13400 | 459403. | ; | C14- | C15 |
| 38 | 40 | 1 | 0.15100 | 265266. | ; | C15- | C16 |
| 40 | 42 | 1 | 0.15290 | 224262. | ; | C16- | C17 |
| 40 | 46 | 1 | 0.15290 | 224262. | ; | C16- | C18 |
| 38 | 39 | 1 | 0.10800 | 307106. | ; | C15- | H1  |
| 40 | 41 | 1 | 0.10900 | 284512. | ; | C16- | H2  |
| 36 | 37 | 1 | 0.10800 | 307106. | ; | C14- | H3  |
| 33 | 34 | 1 | 0.10900 | 284512. | ; | C13- | H4  |
| 30 | 31 | 1 | 0.10900 | 284512. | ; | C12- | H5  |
| 30 | 32 | 1 | 0.10900 | 284512. | ; | C12- | H6  |
| 27 | 28 | 1 | 0.10900 | 284512. | ; | C11- | H7  |
| 23 | 24 | 1 | 0.10900 | 284512. | ; | C10- | H8  |
| 23 | 25 | 1 | 0.10900 | 284512. | ; | C10- | H9  |
| 17 | 18 | 1 | 0.10900 | 284512. | ; | C8-  | H10 |
| 17 | 19 | 1 | 0.10900 | 284512. | ; | C8-  | H11 |
| 1  | 2  | 1 | 0.10800 | 307106. | ; | C1-  | H12 |
| 4  | 5  | 1 | 0.10800 | 307106. | ; | C3-  | H13 |
| 6  | 7  | 1 | 0.10800 | 307106. | ; | C4-  | H14 |
| 33 | 35 | 1 | 0.10900 | 284512. | ; | C13- | H15 |
| 27 | 29 | 1 | 0.10900 | 284512. | ; | C11- | H16 |
| 11 | 12 | 1 | 0.10900 | 284512. | ; | C7-  | H17 |
| 11 | 13 | 1 | 0.10900 | 284512. | ; | C7-  | H18 |
| 11 | 14 | 1 | 0.10900 | 284512. | ; | C7-  | H19 |
| 15 | 16 | 1 | 0.09450 | 462750. | ; | O2-  | H20 |
| 20 | 21 | 1 | 0.10100 | 363171. | ; | N1-  | H21 |
| 46 | 47 | 1 | 0.10900 | 284512. | ; | C18- | H22 |
| 46 | 48 | 1 | 0.10900 | 284512. | ; | C18- | H23 |
| 46 | 49 | 1 | 0.10900 | 284512. | ; | C18- | H24 |
| 42 | 43 | 1 | 0.10900 | 284512. | ; | C17- | H25 |
| 42 | 44 | 1 | 0.10900 | 284512. | ; | C17- | H26 |
| 42 | 45 | 1 | 0.10900 | 284512. | ; | C17- | H27 |

[ constraints ]  
8 16 2 0.19393 ; C5 H20

[ pairs ]

|    |    |   |   |      |     |
|----|----|---|---|------|-----|
| 9  | 4  | 1 | ; | C6-  | C3  |
| 9  | 17 | 1 | ; | C6-  | C8  |
| 2  | 4  | 1 | ; | H12- | C3  |
| 2  | 17 | 1 | ; | H12- | C8  |
| 3  | 8  | 1 | ; | C2-  | C5  |
| 3  | 10 | 1 | ; | C2-  | O1  |
| 2  | 8  | 1 | ; | H12- | C5  |
| 2  | 10 | 1 | ; | H12- | O1  |
| 1  | 6  | 1 | ; | C1-  | C4  |
| 1  | 5  | 1 | ; | C1-  | H13 |
| 17 | 6  | 1 | ; | C8-  | C4  |
| 17 | 5  | 1 | ; | C8-  | H13 |
| 3  | 7  | 1 | ; | C2-  | H14 |

|    |    |   |   |      |     |
|----|----|---|---|------|-----|
| 5  | 8  | 1 | ; | H13- | C5  |
| 5  | 7  | 1 | ; | H13- | H14 |
| 4  | 15 | 1 | ; | C3-  | O2  |
| 7  | 9  | 1 | ; | H14- | C6  |
| 7  | 15 | 1 | ; | H14- | O2  |
| 6  | 10 | 1 | ; | C4-  | O1  |
| 15 | 1  | 1 | ; | O2-  | C1  |
| 15 | 10 | 1 | ; | O2-  | O1  |
| 1  | 11 | 1 | ; | C1-  | C7  |
| 8  | 11 | 1 | ; | C5-  | C7  |
| 9  | 12 | 1 | ; | C6-  | H17 |
| 9  | 13 | 1 | ; | C6-  | H18 |
| 9  | 14 | 1 | ; | C6-  | H19 |
| 6  | 16 | 1 | ; | C4-  | H20 |
| 9  | 16 | 1 | ; | C6-  | H20 |
| 1  | 20 | 1 | ; | C1-  | N1  |
| 1  | 18 | 1 | ; | C1-  | H10 |
| 1  | 19 | 1 | ; | C1-  | H11 |
| 4  | 20 | 1 | ; | C3-  | N1  |
| 4  | 18 | 1 | ; | C3-  | H10 |
| 4  | 19 | 1 | ; | C3-  | H11 |
| 3  | 22 | 1 | ; | C2-  | C9  |
| 3  | 21 | 1 | ; | C2-  | H21 |
| 18 | 22 | 1 | ; | H10- | C9  |
| 18 | 21 | 1 | ; | H10- | H21 |
| 19 | 22 | 1 | ; | H11- | C9  |
| 19 | 21 | 1 | ; | H11- | H21 |
| 17 | 23 | 1 | ; | C8-  | C10 |
| 17 | 26 | 1 | ; | C8-  | O3  |
| 21 | 23 | 1 | ; | H21- | C10 |
| 21 | 26 | 1 | ; | H21- | O3  |
| 20 | 27 | 1 | ; | N1-  | C11 |
| 20 | 24 | 1 | ; | N1-  | H8  |
| 20 | 25 | 1 | ; | N1-  | H9  |
| 26 | 27 | 1 | ; | O3-  | C11 |
| 26 | 24 | 1 | ; | O3-  | H8  |
| 26 | 25 | 1 | ; | O3-  | H9  |
| 22 | 30 | 1 | ; | C9-  | C12 |
| 22 | 28 | 1 | ; | C9-  | H7  |
| 22 | 29 | 1 | ; | C9-  | H16 |
| 24 | 30 | 1 | ; | H8-  | C12 |
| 24 | 28 | 1 | ; | H8-  | H7  |
| 24 | 29 | 1 | ; | H8-  | H16 |
| 25 | 30 | 1 | ; | H9-  | C12 |
| 25 | 28 | 1 | ; | H9-  | H7  |
| 25 | 29 | 1 | ; | H9-  | H16 |
| 23 | 33 | 1 | ; | C10- | C13 |
| 23 | 31 | 1 | ; | C10- | H5  |
| 23 | 32 | 1 | ; | C10- | H6  |
| 28 | 33 | 1 | ; | H7-  | C13 |
| 28 | 31 | 1 | ; | H7-  | H5  |
| 28 | 32 | 1 | ; | H7-  | H6  |
| 29 | 33 | 1 | ; | H16- | C13 |
| 29 | 31 | 1 | ; | H16- | H5  |
| 29 | 32 | 1 | ; | H16- | H6  |
| 27 | 36 | 1 | ; | C11- | C14 |
| 27 | 34 | 1 | ; | C11- | H4  |
| 27 | 35 | 1 | ; | C11- | H15 |
| 31 | 36 | 1 | ; | H5-  | C14 |
| 31 | 34 | 1 | ; | H5-  | H4  |
| 31 | 35 | 1 | ; | H5-  | H15 |
| 32 | 36 | 1 | ; | H6-  | C14 |
| 32 | 34 | 1 | ; | H6-  | H4  |
| 32 | 35 | 1 | ; | H6-  | H15 |
| 30 | 38 | 1 | ; | C12- | C15 |

```

30      37  1      ;      C12-   H3
34      38  1      ;      H4-    C15
34      37  1      ;      H4-    H3
35      38  1      ;      H15-   C15
35      37  1      ;      H15-   H3
33      40  1      ;      C13-   C16
33      39  1      ;      C13-   H1
37      40  1      ;      H3-    C16
37      39  1      ;      H3-    H1
36      42  1      ;      C14-   C17
36      46  1      ;      C14-   C18
36      41  1      ;      C14-   H2
39      42  1      ;      H1-    C17
39      46  1      ;      H1-    C18
39      41  1      ;      H1-    H2
38      43  1      ;      C15-   H25
38      44  1      ;      C15-   H26
38      45  1      ;      C15-   H27
46      43  1      ;      C18-   H25
46      44  1      ;      C18-   H26
46      45  1      ;      C18-   H27
41      43  1      ;      H2-    H25
41      44  1      ;      H2-    H26
41      45  1      ;      H2-    H27
38      47  1      ;      C15-   H22
38      48  1      ;      C15-   H23
38      49  1      ;      C15-   H24
42      47  1      ;      C17-   H22
42      48  1      ;      C17-   H23
42      49  1      ;      C17-   H24
41      47  1      ;      H2-    H22
41      48  1      ;      H2-    H23
41      49  1      ;      H2-    H24

```

[ angles ]

```

; ai aj ak funct th0 cth
  9   1   3   1   120.000  527.1840 ; C6- C1- C2
  2   1   3   1   120.000  292.8800 ; H12- C1- C2
  1   3   4   1   120.000  527.1840 ; C1- C2- C3
  1   3   17  1   120.000  585.7600 ; C1- C2- C8
  2   1   9   1   120.000  292.8800 ; H12- C1- C6
  1   9   8   1   120.000  527.1840 ; C1- C6- C5
  1   9   10  1   120.000  585.7600 ; C1- C6- O1
 17   3   4   1   120.000  585.7600 ; C8- C2- C3
  3   4   6   1   120.000  527.1840 ; C2- C3- C4
  3   4   5   1   120.000  292.8800 ; C2- C3- H13
  5   4   6   1   120.000  292.8800 ; H13- C3- C4
  4   6   8   1   120.000  527.1840 ; C3- C4- C5
  4   6   7   1   120.000  292.8800 ; C3- C4- H14
  7   6   8   1   120.000  292.8800 ; H14- C4- C5
  6   8   9   1   120.000  527.1840 ; C4- C5- C6
  6   8   15  1   120.000  585.7600 ; C4- C5- O2
 15   8   9   1   120.000  585.7600 ; O2- C5- C6
  8   9   10  1   120.000  585.7600 ; C5- C6- O1
  9   10  11  1   111.000  627.6000 ; C6- O1- C7
 10   11  12  1   109.500  292.8800 ; O1- C7- H17
 10   11  13  1   109.500  292.8800 ; O1- C7- H18
 10   11  14  1   109.500  292.8800 ; O1- C7- H19
  8   15  16  1   113.000  292.8800 ; C5- O2- H20
  3   17  20  1   109.700  669.4400 ; C2- C8- N1
  3   17  18  1   109.500  292.8800 ; C2- C8- H10
  3   17  19  1   109.500  292.8800 ; C2- C8- H11
 18   17  20  1   109.500  292.8800 ; H10- C8- N1
 19   17  20  1   109.500  292.8800 ; H11- C8- N1
 17   20  22  1   121.900  418.4000 ; C8- N1- C9

```

|    |    |    |   |         |          |   |        |      |     |
|----|----|----|---|---------|----------|---|--------|------|-----|
| 17 | 20 | 21 | 1 | 118.400 | 317.9840 | ; | C8-    | N1-  | H21 |
| 21 | 20 | 22 | 1 | 119.800 | 292.8800 | ; | H21-   | N1-  | C9  |
| 20 | 22 | 23 | 1 | 116.600 | 585.7600 | ; | N1-    | C9-  | C10 |
| 20 | 22 | 26 | 1 | 122.900 | 669.4400 | ; | N1-    | C9-  | O3  |
| 26 | 22 | 23 | 1 | 120.400 | 669.4400 | ; | O3-    | C9-  | C10 |
| 22 | 23 | 27 | 1 | 111.100 | 527.1840 | ; | C9-    | C10- | C11 |
| 22 | 23 | 24 | 1 | 109.500 | 292.8800 | ; | C9-    | C10- | H8  |
| 22 | 23 | 25 | 1 | 109.500 | 292.8800 | ; | C9-    | C10- | H9  |
| 24 | 23 | 27 | 1 | 110.700 | 313.8000 | ; | H8-    | C10- | C11 |
| 25 | 23 | 27 | 1 | 110.700 | 313.8000 | ; | H9-    | C10- | C11 |
| 23 | 27 | 30 | 1 | 112.700 | 488.2730 | ; | C10-   | C11- | C12 |
| 23 | 27 | 28 | 1 | 110.700 | 313.8000 | ; | C10-   | C11- | H7  |
| 23 | 27 | 29 | 1 | 110.700 | 313.8000 | ; | C10-   | C11- | H16 |
| 28 | 27 | 30 | 1 | 110.700 | 313.8000 | ; | H7-    | C11- | C12 |
| 29 | 27 | 30 | 1 | 110.700 | 313.8000 | ; | H16-   | C11- | C12 |
| 27 | 30 | 33 | 1 | 112.700 | 488.2730 | ; | C11-   | C12- | C13 |
| 27 | 30 | 31 | 1 | 110.700 | 313.8000 | ; | C11-   | C12- | H5  |
| 27 | 30 | 32 | 1 | 110.700 | 313.8000 | ; | C11-   | C12- | H6  |
| 31 | 30 | 33 | 1 | 110.700 | 313.8000 | ; | H5-    | C12- | C13 |
| 32 | 30 | 33 | 1 | 110.700 | 313.8000 | ; | H6-    | C12- | C13 |
| 30 | 33 | 36 | 1 | 111.100 | 527.1840 | ; | C12-   | C13- | C14 |
| 30 | 33 | 34 | 1 | 110.700 | 313.8000 | ; | C12-   | C13- | H4  |
| 30 | 33 | 35 | 1 | 110.700 | 313.8000 | ; | C12-   | C13- | H15 |
| 34 | 33 | 36 | 1 | 109.500 | 292.8800 | ; | H4-    | C13- | C14 |
| 35 | 33 | 36 | 1 | 109.500 | 292.8800 | ; | H15-   | C13- | C14 |
| 33 | 36 | 38 | 1 | 124.000 | 585.7600 | ; | C13-   | C14- | C15 |
| 33 | 36 | 37 | 1 | 117.000 | 292.8800 | ; | filled |      |     |
| 37 | 36 | 38 | 1 | 120.000 | 292.8800 | ; | H3-    | C14- | C15 |
| 36 | 38 | 40 | 1 | 124.000 | 585.7600 | ; | C14-   | C15- | C16 |
| 36 | 38 | 39 | 1 | 120.000 | 292.8800 | ; | C14-   | C15- | H1  |
| 39 | 38 | 40 | 1 | 117.000 | 292.8800 | ; | filled |      |     |
| 38 | 40 | 42 | 1 | 111.100 | 527.1840 | ; | C15-   | C16- | C17 |
| 38 | 40 | 46 | 1 | 111.100 | 527.1840 | ; | C15-   | C16- | C18 |
| 38 | 40 | 41 | 1 | 109.500 | 292.8800 | ; | C15-   | C16- | H2  |
| 46 | 40 | 42 | 1 | 112.700 | 488.2730 | ; | C18-   | C16- | C17 |
| 41 | 40 | 42 | 1 | 110.700 | 313.8000 | ; | H2-    | C16- | C17 |
| 40 | 42 | 43 | 1 | 110.700 | 313.8000 | ; | C16-   | C17- | H25 |
| 40 | 42 | 44 | 1 | 110.700 | 313.8000 | ; | C16-   | C17- | H26 |
| 40 | 42 | 45 | 1 | 110.700 | 313.8000 | ; | C16-   | C17- | H27 |
| 41 | 40 | 46 | 1 | 110.700 | 313.8000 | ; | H2-    | C16- | C18 |
| 40 | 46 | 47 | 1 | 110.700 | 313.8000 | ; | C16-   | C18- | H22 |
| 40 | 46 | 48 | 1 | 110.700 | 313.8000 | ; | C16-   | C18- | H23 |
| 40 | 46 | 49 | 1 | 110.700 | 313.8000 | ; | C16-   | C18- | H24 |
| 35 | 33 | 34 | 1 | 107.800 | 276.1440 | ; | H15-   | C13- | H4  |
| 32 | 30 | 31 | 1 | 107.800 | 276.1440 | ; | H6-    | C12- | H5  |
| 29 | 27 | 28 | 1 | 107.800 | 276.1440 | ; | H16-   | C11- | H7  |
| 25 | 23 | 24 | 1 | 107.800 | 276.1440 | ; | H9-    | C10- | H8  |
| 19 | 17 | 18 | 1 | 107.800 | 276.1440 | ; | H11-   | C8-  | H10 |
| 13 | 11 | 12 | 1 | 107.800 | 276.1440 | ; | H18-   | C7-  | H17 |
| 14 | 11 | 12 | 1 | 107.800 | 276.1440 | ; | H19-   | C7-  | H17 |
| 14 | 11 | 13 | 1 | 107.800 | 276.1440 | ; | H19-   | C7-  | H18 |
| 48 | 46 | 47 | 1 | 107.800 | 276.1440 | ; | H23-   | C18- | H22 |
| 49 | 46 | 47 | 1 | 107.800 | 276.1440 | ; | H24-   | C18- | H22 |
| 49 | 46 | 48 | 1 | 107.800 | 276.1440 | ; | H24-   | C18- | H23 |
| 44 | 42 | 43 | 1 | 107.800 | 276.1440 | ; | H26-   | C17- | H25 |
| 45 | 42 | 43 | 1 | 107.800 | 276.1440 | ; | H27-   | C17- | H25 |
| 45 | 42 | 44 | 1 | 107.800 | 276.1440 | ; | H27-   | C17- | H26 |

```

[ dihedrals ]
; ai aj ak al funct c0 c1 c2 c3 c4 c5
  9  1  3  4  3  30.33400  0.00000  -30.33400  0.00000  0.00000  0.00000  ; dih  C6-  C1-  C2-
  3  1  9  8  3  30.33400  0.00000  -30.33400  0.00000  0.00000  0.00000  ; dih  C1-  C6-  C5
  1  3  4  6  3  30.33400  0.00000  -30.33400  0.00000  0.00000  0.00000  ; dih  C2-  C3-  C4
  3  4  6  8  3  30.33400  0.00000  -30.33400  0.00000  0.00000  0.00000  ; dih  C3-  C4-  C5
  4  6  8  9  3  30.33400  0.00000  -30.33400  0.00000  0.00000  0.00000  ; dih  C4-  C5-  C6
  6  8  9  1  3  30.33400  0.00000  -30.33400  0.00000  0.00000  0.00000  ; dih  C5-  C6-  C1
  1  9  10  11  3  12.55200  0.00000  -12.55200  0.00000  0.00000  0.00000  ; dih  C1-  C7-  C17
  9  10  11  12  3  1.58992  4.76976  0.00000  -6.35968  0.00000  0.00000  ; dih  C6-  O1-  H17
  6  8  15  16  3  7.03749  0.00000  -7.03749  0.00000  0.00000  0.00000  ; dih  C4-  C5-  O2
  1  3  17  20  3  0.00000  0.00000  0.00000  0.00000  0.00000  0.00000  ; dih  C1-  C2-  C8
  3  17  20  22  3  -4.70700  2.92044  1.78656  0.00000  0.00000  0.00000  ; dih  C2-  C8-  N1
  17  20  22  23  3  30.28798  -4.81160  -25.47638  0.00000  0.00000  0.00000  ; dih  C8-  N1-  C9
  20  22  23  27  3  4.83252  -7.65254  1.68196  1.13805  0.00000  0.00000  ; dih  N1-  C9-  C10
  22  23  27  30  3  -4.96013  6.28646  1.30959  -2.63592  0.00000  0.00000  ; dih  C9-  C10-  C11
  23  27  30  33  3  2.92880  -1.46440  0.20920  -1.67360  0.00000  0.00000  ; dih  C10-  C11-  C12
  27  30  33  36  3  2.92880  -1.46440  0.20920  -1.67360  0.00000  0.00000  ; dih  C11-  C12-  C13
  30  33  36  38  3  0.52719  -6.39734  -1.69452  7.56467  0.00000  0.00000  ; dih  C12-  C13-  C14
  33  36  38  40  3  58.57600  0.00000  -58.57600  0.00000  0.00000  0.00000  ; dih  C13-  C14-  C15
  36  38  40  42  3  0.52719  -6.39734  -1.69452  7.56467  0.00000  0.00000  ; dih  C14-  C15-  C16
  38  40  42  43  3  0.76567  2.29701  0.00000  -3.06269  0.00000  0.00000  ; dih  C15-  C16-  C17
  38  40  46  47  3  0.76567  2.29701  0.00000  -3.06269  0.00000  0.00000  ; dih  C16-  C17-  H25
  40  46  47  47  3  0.76567  2.29701  0.00000  -3.06269  0.00000  0.00000  ; dih  C16-  C18-  H22

```

```

[ dihedrals ]
; ai aj ak al funct phi0 cp mult
  1  3  9  2  1  180.000  4.602  2  ; imp  C2-  C6-  H12
  3  1  4  17  1  180.000  4.602  2  ; imp  C1-  C3-  C8
  4  3  6  5  1  180.000  4.602  2  ; imp  C2-  C4-  H13
  6  4  8  7  1  180.000  4.602  2  ; imp  C3-  C5-  H14
  8  6  9  15  1  180.000  4.602  2  ; imp  C4-  C6-  O2
  9  1  8  10  1  180.000  4.602  2  ; imp  C5-  O1
  22  20  23  26  1  180.000  43.932  2  ; imp  C9-  C1-  O3
  36  33  38  37  1  180.000  62.760  2  ; imp  C14-  C13-  H3
  38  36  40  39  1  180.000  62.760  2  ; imp  C15-  C14-  H1

```
